# Supplementary material for: A comparative evaluation of community structure in full-scale digesters indicates that two-phase digesters exhibit greater microbial diversity than single-phase digesters
Source: Royal Society of Chemistry journal article supplement (doi:10.1039/c6ew00320f), 2017-01-01
Supplement: c6ew00320f1.pdf [file c6ew00320f1.pdf]

1 **Electronic Supporting Information for**  
2 **Higher Microbial Diversity in Two-Phase Anaerobic**  
3 **Digestion Improves Process Performance**

4 *Adam L. Smith, Toshio Shimada, and Lutgarde Raskin*

5 **Table of Contents**

6  
7 Supplementary Tables.....S2  
8 Supplementary Figures.....S4

9  
10 **List of Tables**

11  
12 **Table S1.** Primer coverage of *Archaea* for 16S rRNA gene primers F515  
13 (GTGCCAGCMGCCGCGGTAA) and R806 (GGACTACHVGGGTWTCTAAT) targeting the  
14 V4 region (Caporaso et al. 2011) according to TestPrime 1.0. TestPrime 1.0 evaluates the  
15 coverage of primer pairs by running an *in silico* PCR using the SILVA databases. Zero primer  
16 mismatches were allowed.....S2  
17 **Table S2.** Primer coverage of *Bacteria* for 16S rRNA gene primers targeting the V4 region  
18 according to TestPrime 1.0 (see Table S1 legend for additional details). The coverage of taxa in  
19 which known fatty acid-oxidizing syntrophic bacteria group is specified down to the genus or  
20 family levels.....S3

21  
22 **List of Figures**

23  
24 **Figure S1.** Rarefaction curves from each digester.....S4  
25  
26 **Figure S2.** Relative abundance of methanogens identified to the genus level based on 16S rRNA  
27 gene sequencing. Data are expressed as percentages and were normalized using the total number  
28 of 16S rRNA gene sequences classified as known methanogens.....S5  
29  
30 **Figure S3.** Relative abundance at the phylum level based on 16S rRNA gene sequencing. Data are  
31 expressed as percentages and were normalized using the total number of 16S rRNA gene  
32 sequences (including *Bacteria* and *Archaea*).....S6  
33  
34 **Figure S4.** Relative abundance of known sulfate reducing bacteria identified to the genus level  
35 based on 16S rRNA gene sequencing. Data are expressed as percentages and were normalized  
36 using the total number of 16S rRNA gene sequences (including *Bacteria* and *Archaea*). A  
37 truncated y-axis (0 to 2%) is shown to accentuate differences in relative abundance.....S7  
38

39 **Supplementary Tables**

40 **Table S1.** Primer coverage of *Archaea* for 16S rRNA gene primers F515  
 41 (GTGCCAGCMGCCGCGGTAA) and R806 (GGACTACHVGGGTWTCTAAT) targeting the  
 42 V4 region (Caporaso et al. 2011) according to TestPrime 1.0. TestPrime 1.0 evaluates the  
 43 coverage of primer pairs by running an *in silico* PCR using the SILVA databases. Zero primer  
 44 mismatches were allowed.

| Domain  | Phylum         | Class           | Order              | Family                | Genus                | Coverage (%) |
|---------|----------------|-----------------|--------------------|-----------------------|----------------------|--------------|
| Archaea |                |                 |                    |                       |                      | 51           |
| Archaea | Crenarchaeota  |                 |                    |                       |                      | 0            |
| Archaea | Euryarchaeota  |                 |                    |                       |                      | 82           |
| Archaea | Euryarchaeota  | Methanobacteria |                    |                       |                      | 93           |
| Archaea | Euryarchaeota  | Methanobacteria | Methanobacteriales |                       |                      | 93           |
| Archaea | Euryarchaeota  | Methanobacteria | Methanobacteriales | Methanobacteriaceae   |                      | 93           |
| Archaea | Euryarchaeota  | Methanobacteria | Methanobacteriales | Methanobacteriaceae   | Methanobacterium     | 89           |
| Archaea | Euryarchaeota  | Methanobacteria | Methanobacteriales | Methanobacteriaceae   | Methanobrevibacter   | 95           |
| Archaea | Euryarchaeota  | Methanobacteria | Methanobacteriales | Methanobacteriaceae   | Methanosphaera       | 82           |
| Archaea | Euryarchaeota  | Methanobacteria | Methanobacteriales | Methanobacteriaceae   | Methanothermobacter  | 89           |
| Archaea | Euryarchaeota  | Methanobacteria | Methanobacteriales | Methanothermaceae     | Methanothermus       | 100          |
| Archaea | Euryarchaeota  | Methanococci    |                    |                       |                      | 83           |
| Archaea | Euryarchaeota  | Methanococci    | Methanococcales    |                       |                      | 83           |
| Archaea | Euryarchaeota  | Methanococci    | Methanococcales    | Methanocaldococcaceae |                      | 74           |
| Archaea | Euryarchaeota  | Methanococci    | Methanococcales    | Methanocaldococcaceae | Methanocaldococcus   | 92           |
| Archaea | Euryarchaeota  | Methanococci    | Methanococcales    | Methanocaldococcaceae | Methanotorris        | 39           |
| Archaea | Euryarchaeota  | Methanococci    | Methanococcales    | Methanococcaceae      | Methanococcus        | 96           |
| Archaea | Euryarchaeota  | Methanococci    | Methanococcales    | Methanococcaceae      | Methanothermococcus  | 90           |
| Archaea | Euryarchaeota  | Methanomicrobia |                    |                       |                      | 88           |
| Archaea | Euryarchaeota  | Methanomicrobia | Methanocellales    |                       |                      | 88           |
| Archaea | Euryarchaeota  | Methanomicrobia | Methanocellales    | Methanocellaceae      |                      | 89           |
| Archaea | Euryarchaeota  | Methanomicrobia | Methanocellales    | Methanocellaceae      | Methanocella         | 94           |
| Archaea | Euryarchaeota  | Methanomicrobia | Methanomicrobiales |                       |                      | 90           |
| Archaea | Euryarchaeota  | Methanomicrobia | Methanomicrobiales | Family Incertae Sedis | Methanocalculus      | 97           |
| Archaea | Euryarchaeota  | Methanomicrobia | Methanomicrobiales | Methanocorpusculaceae |                      | 82           |
| Archaea | Euryarchaeota  | Methanomicrobia | Methanomicrobiales | Methanocorpusculaceae | Methanocorpusculum   | 82           |
| Archaea | Euryarchaeota  | Methanomicrobia | Methanomicrobiales | Methanomicrobiaceae   |                      | 90           |
| Archaea | Euryarchaeota  | Methanomicrobia | Methanomicrobiales | Methanomicrobiaceae   | Methanoculleus       | 93           |
| Archaea | Euryarchaeota  | Methanomicrobia | Methanomicrobiales | Methanomicrobiaceae   | Methanofollis        | 89           |
| Archaea | Euryarchaeota  | Methanomicrobia | Methanomicrobiales | Methanomicrobiaceae   | Methanogenium        | 97           |
| Archaea | Euryarchaeota  | Methanomicrobia | Methanomicrobiales | Methanomicrobiaceae   | Methanolacinia       | 100          |
| Archaea | Euryarchaeota  | Methanomicrobia | Methanomicrobiales | Methanomicrobiaceae   | Methanomicrobium     | 76           |
| Archaea | Euryarchaeota  | Methanomicrobia | Methanomicrobiales | Methanomicrobiaceae   | Methanoplanus        | 100          |
| Archaea | Euryarchaeota  | Methanomicrobia | Methanomicrobiales | Methanoregulaceae     |                      | 93           |
| Archaea | Euryarchaeota  | Methanomicrobia | Methanomicrobiales | Methanoregulaceae     | Methanolinea         | 94           |
| Archaea | Euryarchaeota  | Methanomicrobia | Methanomicrobiales | Methanoregulaceae     | Methanoregula        | 92           |
| Archaea | Euryarchaeota  | Methanomicrobia | Methanomicrobiales | Methanoregulaceae     | Methanosphaerula     | 100          |
| Archaea | Euryarchaeota  | Methanomicrobia | Methanomicrobiales | Methanospirillaceae   |                      | 83           |
| Archaea | Euryarchaeota  | Methanomicrobia | Methanomicrobiales | Methanospirillaceae   | Methanospirillum     | 83           |
| Archaea | Euryarchaeota  | Methanomicrobia | Methanosarcinales  |                       |                      | 88           |
| Archaea | Euryarchaeota  | Methanomicrobia | Methanosarcinales  | Methanosacetaceae     |                      | 89           |
| Archaea | Euryarchaeota  | Methanomicrobia | Methanosarcinales  | Methanosacetaceae     | Methanosaeata        | 89           |
| Archaea | Euryarchaeota  | Methanomicrobia | Methanosarcinales  | Methanosarcinaceae    |                      | 88           |
| Archaea | Euryarchaeota  | Methanomicrobia | Methanosarcinales  | Methanosarcinaceae    | Methanimicrococcus   | 93           |
| Archaea | Euryarchaeota  | Methanomicrobia | Methanosarcinales  | Methanosarcinaceae    | Methanococcoides     | 86           |
| Archaea | Euryarchaeota  | Methanomicrobia | Methanosarcinales  | Methanosarcinaceae    | Methanohalobium      | 100          |
| Archaea | Euryarchaeota  | Methanomicrobia | Methanosarcinales  | Methanosarcinaceae    | Methanohalophilus    | 89           |
| Archaea | Euryarchaeota  | Methanomicrobia | Methanosarcinales  | Methanosarcinaceae    | Methanolobus         | 91           |
| Archaea | Euryarchaeota  | Methanomicrobia | Methanosarcinales  | Methanosarcinaceae    | Methanomethylovorans | 87           |
| Archaea | Euryarchaeota  | Methanomicrobia | Methanosarcinales  | Methanosarcinaceae    | Methanosalsum        | 100          |
| Archaea | Euryarchaeota  | Methanomicrobia | Methanosarcinales  | Methanosarcinaceae    | Methanosarcina       | 89           |
| Archaea | Euryarchaeota  | Methanomicrobia | Methanosarcinales  | Methermicoccaceae     |                      | 73           |
| Archaea | Euryarchaeota  | Methanomicrobia | Methanosarcinales  | Methermicoccaceae     | Methermicoccus       | 73           |
| Archaea | Euryarchaeota  | Methanopyri     |                    |                       |                      | 0            |
| Archaea | Korarchaeota   |                 |                    |                       |                      | 47           |
| Archaea | Nanoarchaeota  |                 |                    |                       |                      | 0            |
| Archaea | Thaumarchaeota |                 |                    |                       |                      | 8            |

45

46 **Table S2.** Primer coverage of *Bacteria* for 16S rRNA gene primers targeting the V4 region  
 47 according to TestPrime 1.0 (see Table S1 legend for additional details). The coverage of taxa in  
 48 which known fatty acid-oxidizing syntrophic bacteria group is specified down to the genus or  
 49 family levels.

| Domain   | Phylum                | Class                 | Order                  | Family                    | Genus             | Coverage (%) |
|----------|-----------------------|-----------------------|------------------------|---------------------------|-------------------|--------------|
| Bacteria |                       |                       |                        |                           |                   | 86           |
| Bacteria | Acidobacteria         |                       |                        |                           |                   | 91           |
| Bacteria | Actinobacteria        |                       |                        |                           |                   | 81           |
| Bacteria | Aquificae             |                       |                        |                           |                   | 87           |
| Bacteria | Armatimonadetes       |                       |                        |                           |                   | 74           |
| Bacteria | Bacteroidetes         |                       |                        |                           |                   | 87           |
| Bacteria | Caldiserica           |                       |                        |                           |                   | 8            |
| Bacteria | Chlamydiae            |                       |                        |                           |                   | 4            |
| Bacteria | Chlorobi              |                       |                        |                           |                   | 69           |
| Bacteria | Chloroflexi           |                       |                        |                           |                   | 51           |
| Bacteria | Chrysiogenetes        |                       |                        |                           |                   | 100          |
| Bacteria | Cyanobacteria         |                       |                        |                           |                   | 83           |
| Bacteria | Deferribacteres       |                       |                        |                           |                   | 78           |
| Bacteria | Deinococcus-Thermus   |                       |                        |                           |                   | 92           |
| Bacteria | Dictyoglomi           |                       |                        |                           |                   | 88           |
| Bacteria | Elusimicrobia         |                       |                        |                           |                   | 89           |
| Bacteria | Fibrobacteres         |                       |                        |                           |                   | 85           |
| Bacteria | Firmicutes            |                       |                        |                           |                   | 88           |
| Bacteria | Firmicutes            | Clostridia            | Clostridiales          | Clostridiaceae            | Clostridium       | 89           |
| Bacteria | Firmicutes            | Clostridia            | Clostridiales          | Peptococcaceae            | Pelotomaculum     | 92           |
| Bacteria | Firmicutes            | Clostridia            | Clostridiales          | Syntrophomonadaceae       |                   | 90           |
| Bacteria | Firmicutes            | Clostridia            | Thermoanaerobacterales | Family III Incertae Sedis | Tepidanaerobacter | 93           |
| Bacteria | Firmicutes            | Clostridia            | Thermoanaerobacterales | Thermoanaerobacteraceae   | Syntrophaceticus  | 100          |
| Bacteria | Firmicutes            | Clostridia            | Thermoanaerobacterales | Thermoanaerobacteraceae   | Thermacetogenium  | 92           |
| Bacteria | Fusobacteria          |                       |                        |                           |                   | 85           |
| Bacteria | Gemmatimonadetes      |                       |                        |                           |                   | 87           |
| Bacteria | Lentisphaerae         |                       |                        |                           |                   | 77           |
| Bacteria | Nitrospirae           |                       |                        |                           |                   | 89           |
| Bacteria | Planctomycetes        |                       |                        |                           |                   | 80           |
| Bacteria | Proteobacteria        |                       |                        |                           |                   | 89           |
| Bacteria | Proteobacteria        | Alphaproteobacteria   |                        |                           |                   | 83           |
| Bacteria | Proteobacteria        | Betaproteobacteria    |                        |                           |                   | 91           |
| Bacteria | Proteobacteria        | Deltaproteobacteria   |                        |                           |                   | 88           |
| Bacteria | Proteobacteria        | Deltaproteobacteria   | Order Incertae Sedis   | Syntrophorhabdaceae       |                   | 92           |
| Bacteria | Proteobacteria        | Deltaproteobacteria   | Syntrophobacterales    | Syntrophaceae             |                   | 88           |
| Bacteria | Proteobacteria        | Deltaproteobacteria   | Syntrophobacterales    | Syntrophobacteraceae      |                   | 90           |
| Bacteria | Proteobacteria        | Epsilonproteobacteria |                        |                           |                   | 92           |
| Bacteria | Proteobacteria        | Gammaproteobacteria   |                        |                           |                   | 91           |
| Bacteria | Spirochaetae          |                       |                        |                           |                   | 73           |
| Bacteria | Synergistetes         |                       |                        |                           |                   | 90           |
| Bacteria | Tenericutes           |                       |                        |                           |                   | 85           |
| Bacteria | Thermodesulfobacteria |                       |                        |                           |                   | 96           |
| Bacteria | Thermotogae           |                       |                        |                           |                   | 87           |
| Bacteria | Thermotogae           | Thermotogae           | Thermotogales          | Thermotogaceae            | Thermotoga        | 89           |
| Bacteria | Verrucomicrobia       |                       |                        |                           |                   | 85           |

50

51

52

53

54

55 **Supplementary Figures**

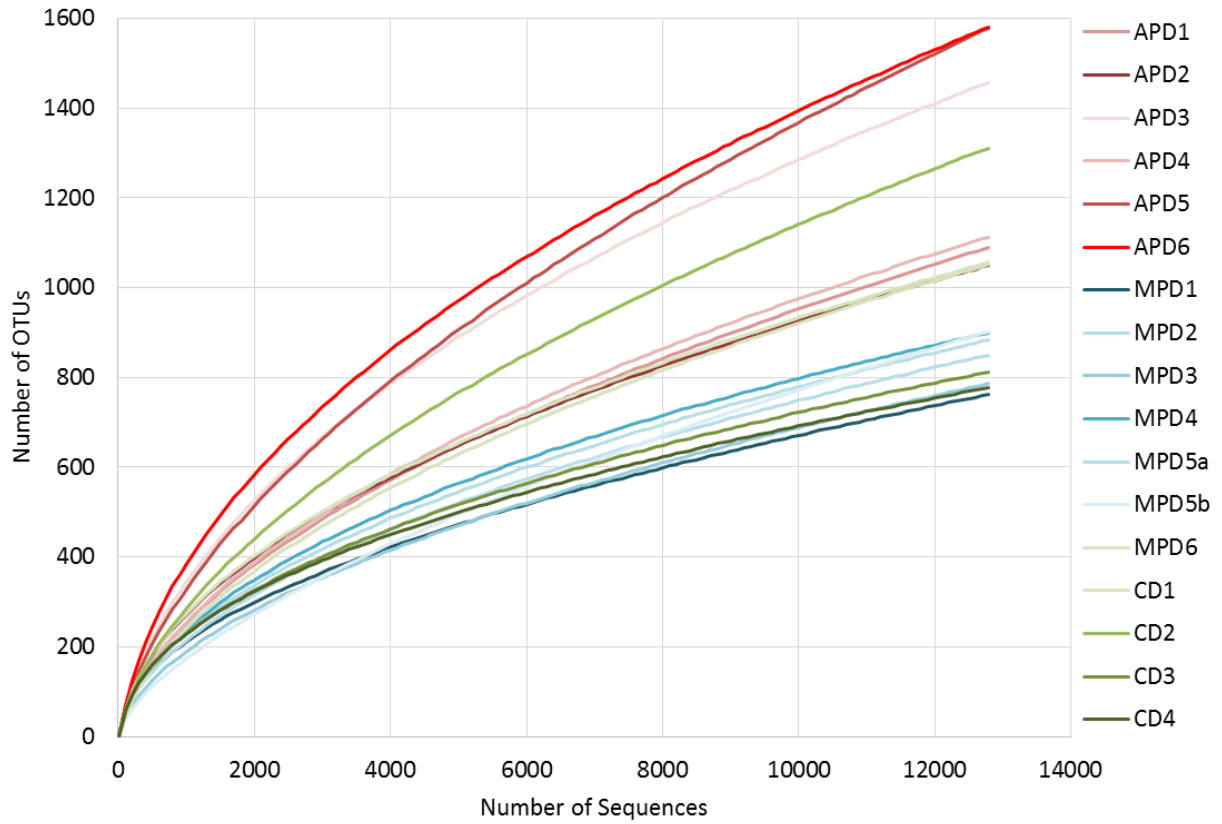

56

57

**Figure S1.** Rarefaction curves from each digester.

58

59

60

61

62

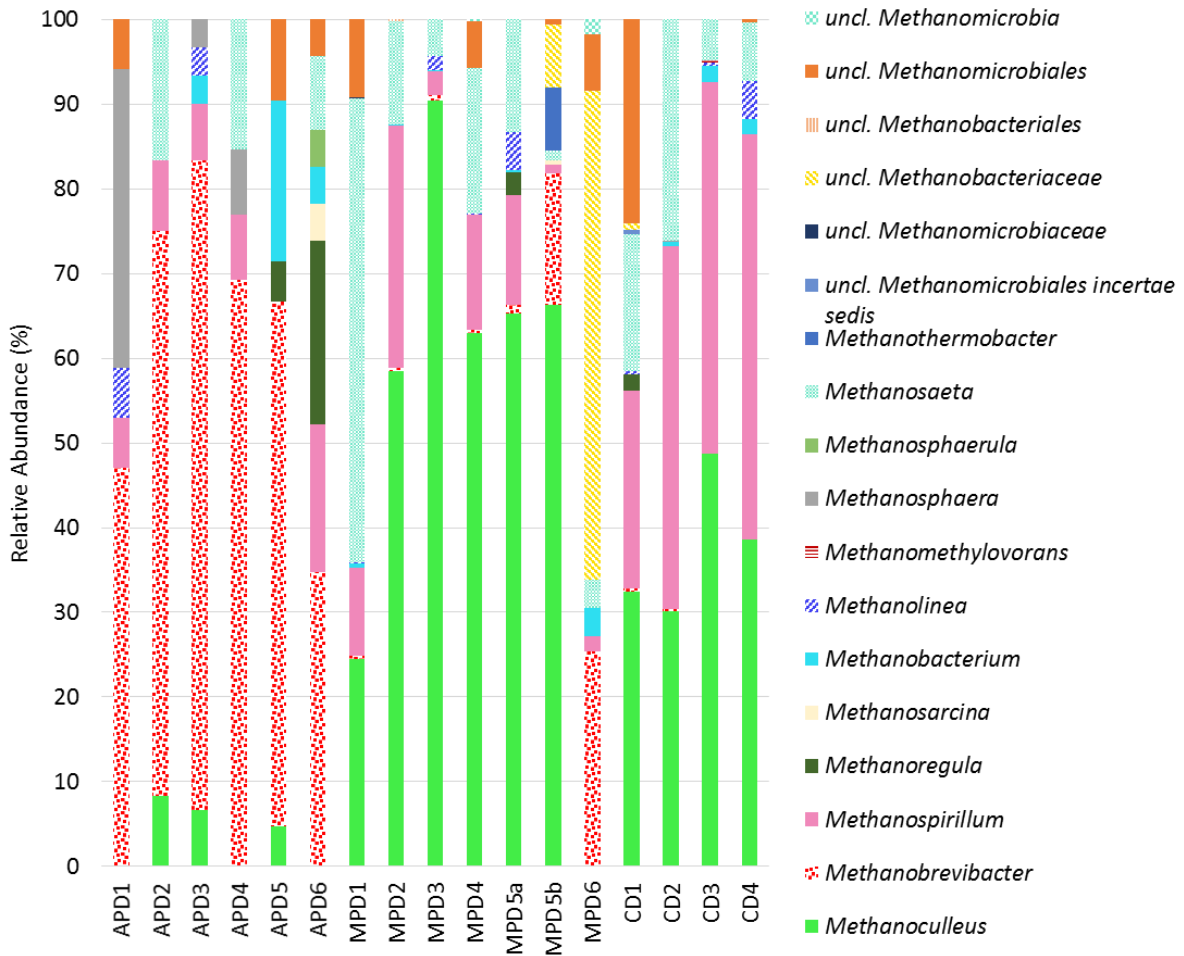

63

64 **Figure S2.** Relative abundance of methanogens identified to the genus level based on 16S rRNA  
 65 gene sequencing. Data are expressed as percentages and were normalized using the total number  
 66 of 16S rRNA gene sequences classified as known methanogens.

67

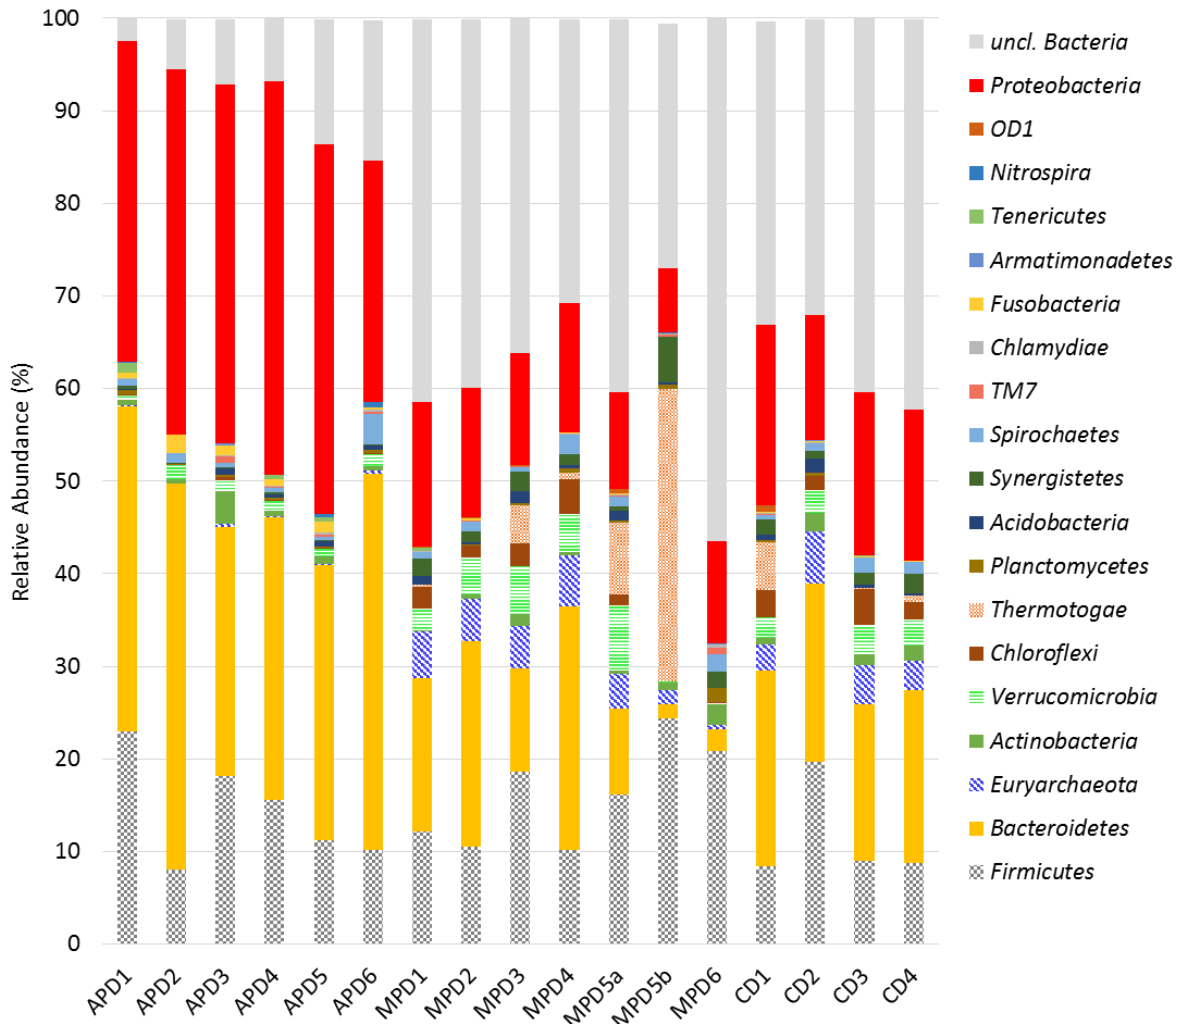

68

69 **Figure S3.** Relative abundance at the phylum level based on 16S rRNA gene sequencing. Data  
 70 are expressed as percentages and were normalized using the total number of 16S rRNA gene  
 71 sequences (including *Bacteria* and *Archaea*).

72

73

74

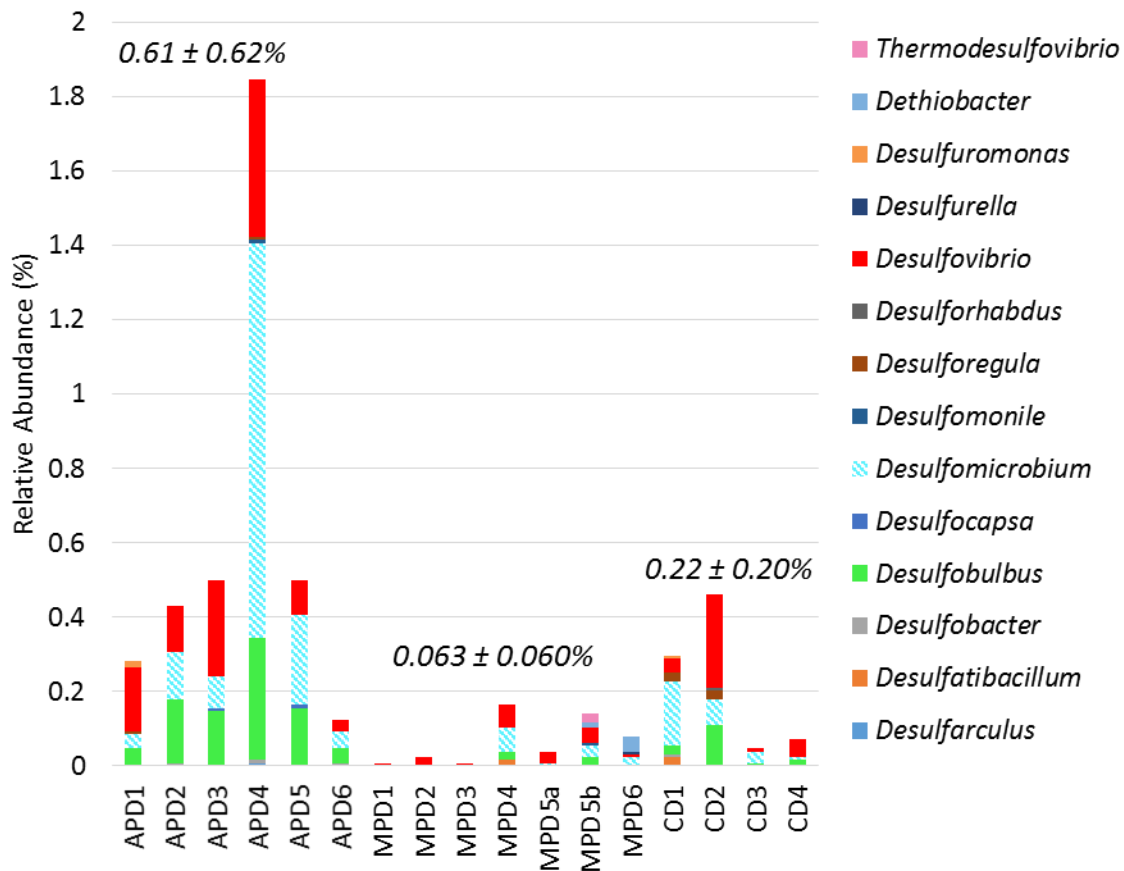

75

76 **Figure S4.** Relative abundance of known sulfate reducing bacteria identified to the genus level  
 77 based on 16S rRNA gene sequencing. Data are expressed as percentages and were normalized  
 78 using the total number of 16S rRNA gene sequences (including *Bacteria* and *Archaea*). A  
 79 truncated y-axis (0 to 2%) is shown to accentuate differences in relative abundance.

80

81

82
